# Supplementary figures and images for: Marfan Syndrome Caused by Disruption of the FBN1 Gene due to A Reciprocal Chromosome Translocation
Source: MDPI journal article supplement (doi:10.3390/genes12111836), 2021-11-21

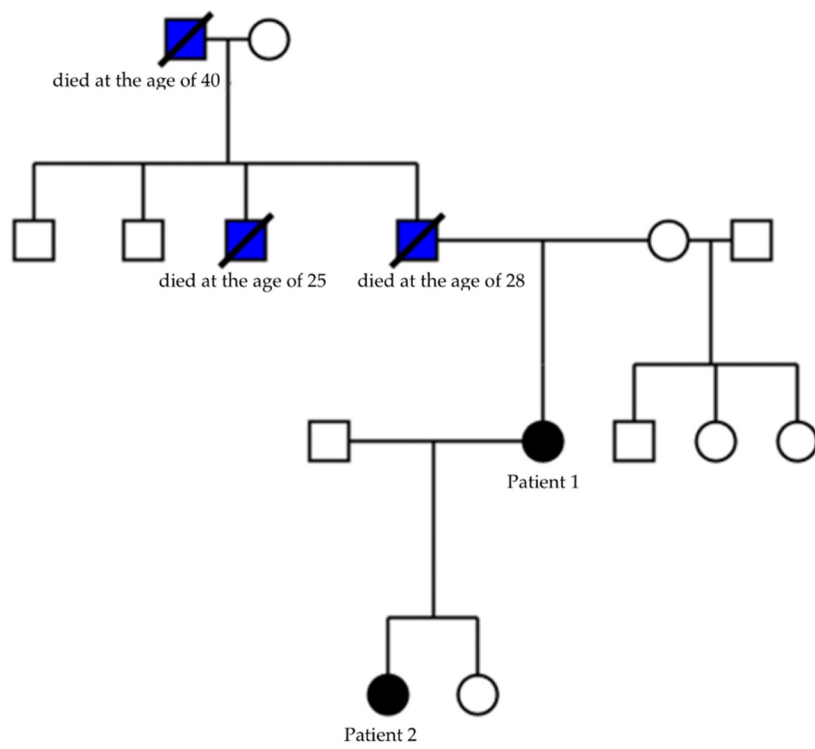

Supplement: s1 [file s1]

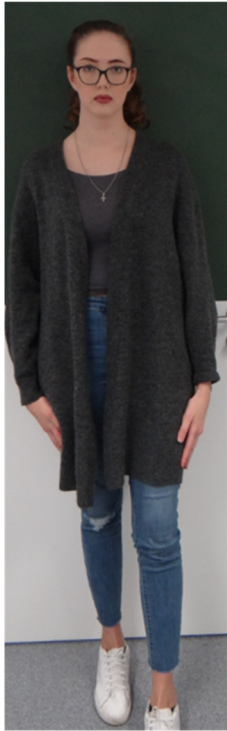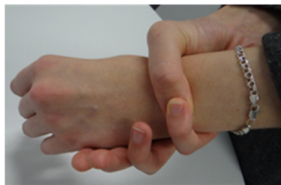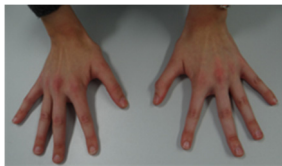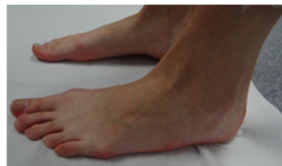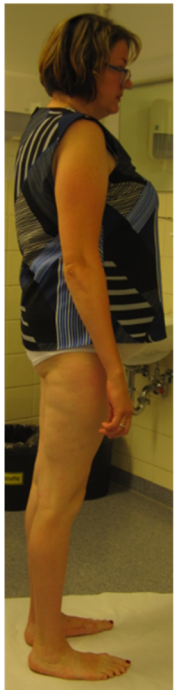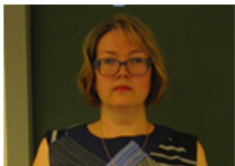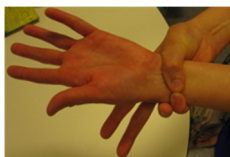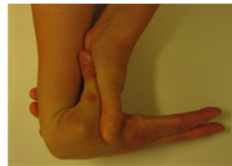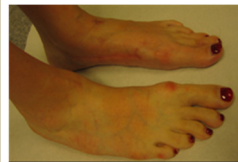

Supplement: s1 [file s1]
